# Supplementary material
Source: publisher site journal article supplement (https://www.dovepress.com/article/527558)
Supplement: Supplementary file 1 [file Supplementary%20data_1_1.docx]

**Supplementary Table 1** 𝝙 Abs/min values represented in Figure 2 B

| Sample | 𝝙 Abs/min |
| --- | --- |
| Buffer Replicate 1 | 0.030 |
| Buffer Replicate 2 | 0.029 |
| Buffer Replicate 3 | 0.025 |
| 0% PS Replicate 1 | 0.030 |
| 0 % PS Replicate 2 | 0.030 |
| 0% PS Replicate 3 | 0.027 |
| 5% PS Replicate 1 | 0.030 |
| 5% PS Replicate 2 | 0.030 |
| 5% PS Replicate 3 | 0.026 |
| 10% PS Replicate 1 | 0.029 |
| 10% PS Replicate 2 | 0.030 |
| 10% PS Replicate 3 | 0.026 |
| 20% PS Replicate 1 | 0.030 |
| 20% PS Replicate 2 | 0.030 |
| 20% PS Replicate 3 | 0.026 |

**Notes:** Calculated change in absorbance per minute from data recorded between 0-20 minutes. These are average values from 3 technical replicates measured for each preparation.

**Supplementary Table 2** Maximum absorbance values represented in Figure 2 D

| Sample | Maximum absorbance |
| --- | --- |
| Buffer Replicate 1 | 0.808 |
| Buffer Replicate 2 | 1.253 |
| Buffer Replicate 3 | 1.058 |
| 0% PS Replicate 1 | 1.209 |
| 0 % PS Replicate 2 | 1.452 |
| 0% PS Replicate 3 | 1.200 |
| 5% PS Replicate 1 | 1.305 |
| 5% PS Replicate 2 | 1.346 |
| 5% PS Replicate 3 | 1.089 |
| 10% PS Replicate 1 | 1.334 |
| 10% PS Replicate 2 | 1.212 |
| 10% PS Replicate 3 | 1.178 |
| 20% PS Replicate 1 | 1.108 |
| 20% PS Replicate 2 | 1.186 |
| 20% PS Replicate 3 | 1.135 |

**Notes:** These are average values from 3 technical replicates measured for each preparation.

**Supplementary Table 3** 𝝙 Abs/min values represented in Figure 3 B

| Sample | 𝝙 Abs/min |
| --- | --- |
| Buffer 0 𝝻M Replicate 1 | 0.019 |
| Buffer 0 𝝻M Replicate 2 | 0.021 |
| Buffer 0 𝝻M Replicate 3 | 0.023 |
| PC/PE 5 𝝻M Replicate 1 | 0.020 |
| PC/PE 5 𝝻M Replicate 2 | 0.022 |
| PC/PE 5 𝝻M Replicate 3 | 0.023 |
| PC/PE 10 𝝻M Replicate 1 | 0.020 |
| PC/PE 10 𝝻M Replicate 2 | 0.022 |
| PC/PE 10 𝝻M Replicate 3 | 0.023 |
| PC/PE 20 𝝻M Replicate 1 | 0.020 |
| PC/PE 20 𝝻M Replicate 2 | 0.022 |
| PC/PE 20 𝝻M Replicate 3 | 0.023 |
| PC/PE/PS 5 𝝻M Replicate 1 | 0.019 |
| PC/PE/PS 5 𝝻M Replicate 2 | 0.022 |
| PC/PE/PS 5 𝝻M Replicate 3 | 0.022 |
| PC/PE/PS 10 𝝻M Replicate 1 | 0.020 |
| PC/PE/PS 10 𝝻M Replicate 2 | 0.022 |
| PC/PE/PS 10 𝝻M Replicate 3 | 0.023 |
| PC/PE/PS 20 𝝻M Replicate 1 | 0.020 |
| PC/PE/PS 20 𝝻M Replicate 2 | 0.022 |
| PC/PE/PS 20 𝝻M Replicate 3 | 0.023 |
| PC/PE/PS (15-HETE-PE) 5 𝝻M Replicate 1 | 0.020 |
| PC/PE/PS (15-HETE-PE) 5 𝝻M Replicate 2 | 0.022 |
| PC/PE/PS (15-HETE-PE) 5 𝝻M Replicate 3 | 0.022 |
| PC/PE/PS (15-HETE-PE) 10 𝝻M Replicate 1 | 0.020 |
| PC/PE/PS (15-HETE-PE) 10 𝝻M Replicate 2 | 0.021 |
| PC/PE/PS (15-HETE-PE) 10 𝝻M Replicate 3 | 0.022 |
| PC/PE/PS (15-HETE-PE) 20 𝝻M Replicate 1 | 0.020 |
| PC/PE/PS (15-HETE-PE) 20 𝝻M Replicate 2 | 0.022 |
| PC/PE/PS (15-HETE-PE) 20 𝝻M Replicate 3 | 0.022 |

**Notes:** Calculated change in absorbance per minute from data recorded between 0-100 minutes. These are average values from 3 technical replicates measured for each preparation.

**Supplementary Table 4** Lysis time values represented in Figure 3 D

| Sample | Lysis Time (min) |
| --- | --- |
| Buffer 0 𝝻M Replicate 1 | 80.4 |
| Buffer 0 𝝻M Replicate 2 | 92.3 |
| Buffer 0 𝝻M Replicate 3 | 100.3 |
| PC/PE 1 𝝻M Replicate 1 | 99.1 |
| PC/PE 1 𝝻M Replicate 2 | 100.7 |
| PC/PE 1 𝝻M Replicate 3 | 103.4 |
| PC/PE 4 𝝻M Replicate 1 | 87 |
| PC/PE 4 𝝻M Replicate 2 | 88.7 |
| PC/PE 4 𝝻M Replicate 3 | 110.1 |
| PC/PE 7 𝝻M Replicate 1 | 74.7 |
| PC/PE 7 𝝻M Replicate 2 | 93.5 |
| PC/PE 7 𝝻M Replicate 3 | 99.5 |
| PC/PE 10 𝝻M Replicate 1 | 83.6 |
| PC/PE 10 𝝻M Replicate 2 | 89.8 |
| PC/PE 10 𝝻M Replicate 3 | 95.9 |
| PC/PE 16 𝝻M Replicate 1 | 99 |
| PC/PE 16 𝝻M Replicate 2 | 91.7 |
| PC/PE 16 𝝻M Replicate 3 | 105.5 |
| PC/PE 20 𝝻M Replicate 1 | 101.4 |
| PC/PE 20 𝝻M Replicate 2 | 96.6 |
| PC/PE 20 𝝻M Replicate 3 | 106.1 |
| PC/PE/PS 1 𝝻M Replicate 1 | 94.9 |
| PC/PE/PS 1 𝝻M Replicate 2 | 94.8 |
| PC/PE/PS 1 𝝻M Replicate 3 | 106.3 |
| PC/PE/PS 4 𝝻M Replicate 1 | 87 |
| PC/PE/PS 4 𝝻M Replicate 2 | 90.3 |
| PC/PE/PS 4 𝝻M Replicate 3 | 101.3 |
| PC/PE/PS 7 𝝻M Replicate 1 | 85.8 |
| PC/PE/PS 7 𝝻M Replicate 2 | 85.4 |
| PC/PE/PS 7 𝝻M Replicate 3 | 99.8 |
| PC/PE/PS 10 𝝻M Replicate 1 | 101.2 |
| PC/PE/PS 10 𝝻M Replicate 2 | 97.6 |
| PC/PE/PS 10 𝝻M Replicate 3 | 115.3 |
| PC/PE/PS 16 𝝻M Replicate 1 | 87 |
| PC/PE/PS 16 𝝻M Replicate 2 | 93 |
| PC/PE/PS 16 𝝻M Replicate 3 | 109.7 |
| PC/PE/PS 20 𝝻M Replicate 1 | 82 |
| PC/PE/PS 20 𝝻M Replicate 2 | 80.8 |
| PC/PE/PS 20 𝝻M Replicate 3 | 102.3 |
| PC/PE/PS (15-HETE-PE) 1 𝝻M Replicate 1 | 90.1 |
| PC/PE/PS (15-HETE-PE) 1 𝝻M Replicate 2 | 97 |
| PC/PE/PS (15-HETE-PE) 1 𝝻M Replicate 3 | 114.6 |
| PC/PE/PS (15-HETE-PE) 4 𝝻M Replicate 1 | 87.4 |
| PC/PE/PS (15-HETE-PE) 4 𝝻M Replicate 2 | 88 |
| PC/PE/PS (15-HETE-PE) 4 𝝻M Replicate 3 | 103.9 |
| PC/PE/PS (15-HETE-PE) 7 𝝻M Replicate 1 | 92.4 |
| PC/PE/PS (15-HETE-PE) 7 𝝻M Replicate 2 | 98.7 |
| PC/PE/PS (15-HETE-PE) 7 𝝻M Replicate 3 | 108.7 |
| PC/PE/PS (15-HETE-PE) 10 𝝻M Replicate 1 | 96.6 |
| PC/PE/PS (15-HETE-PE) 10 𝝻M Replicate 2 | 89.1 |
| PC/PE/PS (15-HETE-PE) 10 𝝻M Replicate 3 | 108.4 |
| PC/PE/PS (15-HETE-PE) 16 𝝻M Replicate 1 | 83.4 |
| PC/PE/PS (15-HETE-PE) 16 𝝻M Replicate 2 | 94 |
| PC/PE/PS (15-HETE-PE) 16 𝝻M Replicate 3 | 106.7 |
| PC/PE/PS (15-HETE-PE) 20 𝝻M Replicate 1 | 91.4 |
| PC/PE/PS (15-HETE-PE) 20 𝝻M Replicate 2 | 87.9 |
| PC/PE/PS (15-HETE-PE) 20 𝝻M Replicate 3 | 90.1 |

**Notes:** These are average values from 3 technical replicates measured for each preparation.

**Supplementary Table 5** Lysis time values represented in Figure 3 F

| Sample | Lysis Time (min) |
| --- | --- |
| Buffer 0 𝝻M Replicate 1 | 57.8 |
| Buffer 0 𝝻M Replicate 2 | 51 |
| Buffer 0 𝝻M Replicate 3 | 45.4 |
| PC/PE 1 𝝻M Replicate 1 | 60.9 |
| PC/PE 1 𝝻M Replicate 2 | 60.2 |
| PC/PE 1 𝝻M Replicate 3 | 57 |
| PC/PE 4 𝝻M Replicate 1 | 69.8 |
| PC/PE 4 𝝻M Replicate 2 | 66.7 |
| PC/PE 4 𝝻M Replicate 3 | 53.3 |
| PC/PE 7 𝝻M Replicate 1 | 64.6 |
| PC/PE 7 𝝻M Replicate 2 | 67.8 |
| PC/PE 7 𝝻M Replicate 3 | 58.1 |
| PC/PE 10 𝝻M Replicate 1 | 69.6 |
| PC/PE 10 𝝻M Replicate 2 | 61.9 |
| PC/PE 10 𝝻M Replicate 3 | 57.9 |
| PC/PE 16 𝝻M Replicate 1 | 84 |
| PC/PE 16 𝝻M Replicate 2 | 83.4 |
| PC/PE 16 𝝻M Replicate 3 | 77.3 |
| PC/PE 20 𝝻M Replicate 1 | 54.7 |
| PC/PE 20 𝝻M Replicate 2 | 53.8 |
| PC/PE 20 𝝻M Replicate 3 | 52.7 |
| PC/PE/PS 1 𝝻M Replicate 1 | 69.3 |
| PC/PE/PS 1 𝝻M Replicate 2 | 57.2 |
| PC/PE/PS 1 𝝻M Replicate 3 | 59.8 |
| PC/PE/PS 4 𝝻M Replicate 1 | 60.5 |
| PC/PE/PS 4 𝝻M Replicate 2 | 58.2 |
| PC/PE/PS 4 𝝻M Replicate 3 | 57 |
| PC/PE/PS 7 𝝻M Replicate 1 | 55.6 |
| PC/PE/PS 7 𝝻M Replicate 2 | 52.2 |
| PC/PE/PS 7 𝝻M Replicate 3 | 49.3 |
| PC/PE/PS 10 𝝻M Replicate 1 | 62.4 |
| PC/PE/PS 10 𝝻M Replicate 2 | 66.1 |
| PC/PE/PS 10 𝝻M Replicate 3 | 60.6 |
| PC/PE/PS 16 𝝻M Replicate 1 | 67.2 |
| PC/PE/PS 16 𝝻M Replicate 2 | 65.7 |
| PC/PE/PS 16 𝝻M Replicate 3 | 55.3 |
| PC/PE/PS 20 𝝻M Replicate 1 | 61.8 |
| PC/PE/PS 20 𝝻M Replicate 2 | 62.9 |
| PC/PE/PS 20 𝝻M Replicate 3 | 52 |
| PC/PE/PS (15-HETE-PE) 1 𝝻M Replicate 1 | 59 |
| PC/PE/PS (15-HETE-PE) 1 𝝻M Replicate 2 | 61.1 |
| PC/PE/PS (15-HETE-PE) 1 𝝻M Replicate 3 | 54.9 |
| PC/PE/PS (15-HETE-PE) 4 𝝻M Replicate 1 | 54.5 |
| PC/PE/PS (15-HETE-PE) 4 𝝻M Replicate 2 | 48 |
| PC/PE/PS (15-HETE-PE) 4 𝝻M Replicate 3 | 50.6 |
| PC/PE/PS (15-HETE-PE) 7 𝝻M Replicate 1 | 61 |
| PC/PE/PS (15-HETE-PE) 7 𝝻M Replicate 2 | 67.7 |
| PC/PE/PS (15-HETE-PE) 7 𝝻M Replicate 3 | 54.8 |
| PC/PE/PS (15-HETE-PE) 10 𝝻M Replicate 1 | 64.2 |
| PC/PE/PS (15-HETE-PE) 10 𝝻M Replicate 2 | 60.4 |
| PC/PE/PS (15-HETE-PE) 10 𝝻M Replicate 3 | 61.4 |
| PC/PE/PS (15-HETE-PE) 16 𝝻M Replicate 1 | 53.9 |
| PC/PE/PS (15-HETE-PE) 16 𝝻M Replicate 2 | 49.9 |
| PC/PE/PS (15-HETE-PE) 16 𝝻M Replicate 3 | 50.5 |
| PC/PE/PS (15-HETE-PE) 20 𝝻M Replicate 1 | 59.4 |
| PC/PE/PS (15-HETE-PE) 20 𝝻M Replicate 2 | 55.5 |
| PC/PE/PS (15-HETE-PE) 20 𝝻M Replicate 3 | 51.5 |

**Notes:** These are average values from 3 technical replicates measured for each preparation.

**Supplementary Table 6** % Residual FVa activity values represented in Figure 4

|  | Sample | % Residual FVa Activity |
| --- | --- | --- |
| - Protein S | PC/PE/PS Replicate 1 | 57.78 |
| PC/PE/PS Replicate 2 | 51.02 |
| PC/PE/PS Replicate 3 | 45.36 |
| PC/PE/PS(15-HETE-PE) Replicate 1 | 60.85 |
| PC/PE/PS(15-HETE-PE) Replicate 2 | 60.23 |
| PC/PE/PS(15-HETE-PE) Replicate 3 | 56.98 |
| PC/PE/PS(15-HETE-PC) Replicate 1 | 69.79 |
| PC/PE/PS(15-HETE-PC) Replicate 2 | 66.72 |
| PC/PE/PS(15-HETE-PC) Replicate 3 | 53.34 |
| + Protein S | PC/PE/PS Replicate 1 | 64.61 |
| PC/PE/PS Replicate 2 | 67.77 |
| PC/PE/PS Replicate 3 | 58.10 |
| PC/PE/PS(15-HETE-PE) Replicate 1 | 69.60 |
| PC/PE/PS(15-HETE-PE) Replicate 2 | 61.95 |
| PC/PE/PS(15-HETE-PE) Replicate 3 | 57.93 |
| PC/PE/PS(15-HETE-PC) Replicate 1 | 83.99 |
| PC/PE/PS(15-HETE-PC) Replicate 2 | 83.40 |
| PC/PE/PS(15-HETE-PC) Replicate 3 | 77.33 |

**Notes:** These are average values from 3 technical replicates measured for each preparation.
